# Supplementary material
Source: Research Square preprint supplement (doi:10.21203/rs.3.rs-9193793/v1)
Supplement: Supplementary file 1 [file e0f973a1040f17cea7133efd.docx]

**Supplementary Appendix S1: OHL-Ortho**

| Elements | Questions |
| --- | --- |
| A | ***ACCESS TO ORAL HEALTH INFORMATION AND SERVICE*** |
| 1) I can assess reliable oral health information about gum disease and its related conditions called periodontal disease. |
| 2) I can find accurate information on how to properly clean my teeth during orthodontic treatment. |
| 3) I can find accurate information on dental cleaning tools such as toothbrushes, dental floss, and interdental brushes, which are used to clean my teeth and braces. |
| 4) I can find accurate information on the recommended foods during orthodontic treatment. |
| 5) I can seek advice from a dentist or a healthcare provider. |
| 6) I can find reliable sources to locate clinics or hospitals providing orthodontic treatment. |
| 7) I can find reliable sources when searching for orthodontic specialists. |
| B | ***UNDERSTANDING OF ORAL HEALTH INFORMATION AND SERVICES*** |
| 1) I understand information about gum and periodontal disease. |
| 2) I understand the information on how to properly clean my teeth. |
| 3) I can remember important terms related to orthodontic treatment, such as elastic crossing and wire adjustment. |
| 4) I understand the information about the recommended foods during orthodontic treatment. |
| 5) I can remember the recommended foods to be consumed during orthodontic treatment. |
| 6) I understand dentists' advice on oral health care. |
| 7) I can remember the appointment dates for my orthodontic treatment and emergencies. |
| C | ***APPRAISAL OF ORAL HEALTH INFORMATION AND SERVICES*** |
| 1) I can assess the condition of my gums and evaluate the presence of periodontal disease. |
| 2) I can identify behaviors that can increase the risk of gum and periodontal disease. |
| 3) I recognize appropriate approaches for gum and periodontal disease prevention. |
| 4) I can compare the pros and cons of oral health products while using them during orthodontic treatment. |
| 5) I can provide a list of foods that may increase the risk of gum and periodontal disease. |
| 6) I review the benefits and reliability of oral health information before trusting or using it. |
| 7) I can determine the appropriate time for scheduling checkups for my oral health. |
| 8) I can evaluate oral conditions that require a dentist's visit before the appointment. |
| D | ***APPLICATION OF ORAL HEALTH INFORMATION AND SERVICES*** |
| 1) I can choose the methods of cleaning my teeth and braces. |
| 2) I can choose the appropriate oral cleaning tools which are used to clean my teeth and braces. |
| 3) I can choose the recommended foods to be consumed during orthodontic treatment. |
| 4) I use oral health information to guide me in adjusting my behavior or lifestyle for better oral health. |
| 5) I can decide when to schedule oral health checkups. |
| E | ***COMMUNICATION OF ORAL HEALTH INFORMATION AND SERVICES*** |
| 1) I suggest others proper teeth cleaning methods based on reliable sources for oral health care. |
| 2) I advise others on choosing suitable dental cleaning tools for maintaining oral health during orthodontic treatment. |
| 3) I advise others to reduce behaviors that pose risks to gum and periodontal disease to improve their oral health. |
| 4) I communicate with dentists or dental staff, expressing my dental needs and concerns. |

**Supplementary Appendix S2: OHB**

| Elements | Questions |
| --- | --- |
| A | ***ORAL HYGIENE PRACTICES*** |
| 1) I brush my teeth at least twice daily. |
| 2) I brush for at least 2 min each time. |
| 3) I brush my teeth by angling the bristles of the toothbrush towards the gumline. I move the brush back and forth briefly and then brush up and down until the entire mouth is covered. |
| 4) I brush with the appropriate amount of pressure. |
| 5) I use a soft-bristled toothbrush. |
| 6) I use a proxabrush or superfloss to clean my braces. |
| 7) I use fluoridated toothpaste. |
| B | ***DIETARY CHOICE*** |
| 1) I consume sticky foods that stick to my teeth. |
| 2) I consume sweet desserts. |
| 3) I drink sweetened beverages. |
| 4) I consume candies or lollipops. |
| 5) I consume crispy or hard food. |
| C | ***DENTAL SERVICE UTILIZATION*** |
| 1) In the past year, I have received dental services to prevent gum and periodontal disease while undergoing orthodontic treatment. |
| 2) In the past year, I have received advice from dental professionals on how to prevent gum and periodontal disease during orthodontic treatment. |

**Supplementary Appendix S3:** **12-item Multiple-Choice Knowledge Quiz**

| **#** | **Question** | **Options** | **OHL-Ortho Mapping** |
| --- | --- | --- | --- |
| 1 | Where is the best place to find instructions on how to clean your teeth and braces during orthodontic treatment? | A. A social media influencer’s post  **B. A pamphlet or website from your orthodontist**  C. A random internet forum  D. An ad for a new mouthwash | Access #2 |
| 2 | If you needed to find an orthodontic clinic or specialist near you, where would you look for reliable information? | **A. A list from the dental association or health ministry**  B. An Instagram story  C. A flashy website with no contact details  D. A billboard ad with smiling faces | Access #6–7 |
| 3 | What does “periodontal disease” mean? | A. A cavity under a bracket  **B. An infection of the gums and bone around teeth**  C. A problem only with enamel  D. Loose brackets on braces | Understanding #1 |
| 4 | What does the term “elastic crossing” in braces most likely refer to? | **A. Rubber bands used to align teeth**  B. A technique to glue brackets  C. A new mouthwash  D. A toothpaste brand | Understanding #3 |
| 5 | Which behavior increases the risk of gum inflammation during orthodontic treatment? | A. Brushing gently twice a day  **B. Skipping flossing around braces**  C. Using fluoride mouthwash  D. Visiting the dentist regularly | Appraisal #2 |
| 6 | Before trusting a viral tip about brushing techniques you saw online, what should you do first? | **A. Check if it’s from a reputable dental source**  B. Count the number of likes  C. See if the font is large and clear  D. Make sure a celebrity posted it | Appraisal #6 |
| 7 | To clean under the archwire and around brackets effectively, which tool should you use? | A. A regular toothbrush only  **B. An interdental brush or orthodontic toothbrush**  C. Mouthwash only  D. A cotton swab | Application #1–2 |
| 8 | If sugary drinks and poor brushing lead to plaque buildup and white spots on teeth, what should you do? | A. Keep drinking them and brush less  **B. Switch to water and sugar-free drinks and brush regularly**  C. Only brush once a week  D. Only worry if a bracket breaks | Application #3 |
| 9 | You notice a small sore on your gums near a bracket that hasn’t healed in several days. What is the best next step? | A. Ignore it  **B. Rinse with warm salt water, brush carefully, and call your orthodontist if it doesn't heal**  C. Wait until your next annual check-up  D. Try a viral home remedy from YouTube | Appraisal #8 / Application #4 |
| 10 | How would you advise a friend who doesn’t know how to floss around braces? | A. Tell them to guess  **B. Show them how to use a floss threader**  C. Tell them not to floss at all  D. Say flossing isn’t needed with braces | Communication #1–3 |
| 11 | If you have concerns such as pain or a broken wire, what should you do? | A. Wait and hope it gets better  **B. Contact your orthodontist**  C. Search for a home remedy online  D. Ignore it | Communication #4 |
| 12 | When should you schedule your next orthodontic check-up? | A. Only if something breaks  **B. Every 4–6 weeks, as recommended by your orthodontist**  C. Once a year  D. Whenever you remember | Appraisal #7 / Application #5 |

**Supplementary Appendix S4:** **Proforma**

| **Variable** | **Response** |
| --- | --- |
| **Participant ID** | **___________________________** |
| **Age (years)** | **___________________________** |
| **Gender** | **☐ Male  ☐ Female  ☐ Other** |
| **Educational Level** | **☐ No formal education  ☐ Primary  ☐ Secondary  ☐ Graduate  ☐ Postgraduate** |
| **Duration of Fixed Appliance Wear (months)** | **___________________________** |
| **Orthodontic Treatment Stage** | **☐ Alignment/Leveling  ☐ Space Closure  ☐ Finishing** |
| **OHB Total Score (14–70)** | **___________________________** |
| **OHL-Ortho Total Score (31–155)** | **___________________________** |
| **MCQ Knowledge Total Score (0–12)** | **___________________________** |
| **Final OHI-S Score (0–6)** | **___________________________** |
| **Final CPITN Score (0–4)** | **___________________________** |
